# Supplementary material for: Increasing the perceived relevance of cervical screening in older women who do not plan to attend screening
Source: PubMed Central journal article supplement (PMC7029243; doi:10.1136/sextrans-2019-054120), 2019-08-08
Supplement: sextrans-2019-054120supp001.pdf [file sextrans-2019-054120supp001.pdf]

Supplementary Figure 1: Recruitment flow diagram

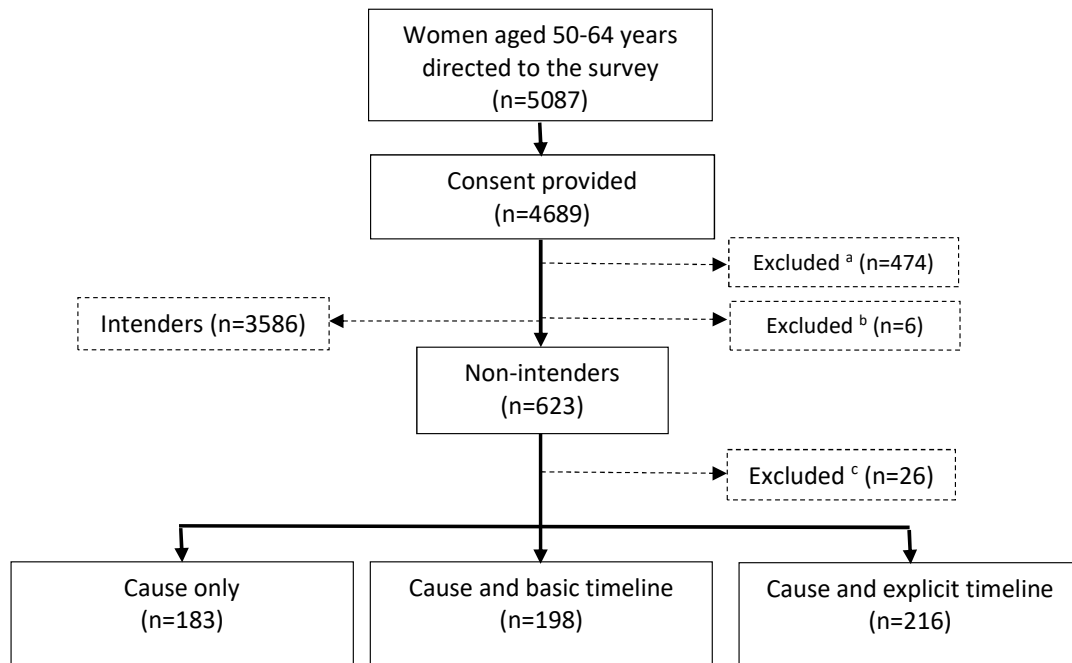

<sup>a</sup> Never heard of screening, never been invited, had a hysterectomy

<sup>b</sup> Intention question not answered

<sup>c</sup> Dropped out
